# Supplementary material
Source: PubMed Central journal article supplement (PMC6858883)
Supplement: EMS84534-supplement-1.pdf [file EMS84534-supplement-1.pdf]

# Supplementary Information

## Genetic recoding to dissect the roles of site-specific protein O-GlcNAcylation

Andrii Gorelik<sup>1</sup>, Sergio Galan Bartual<sup>1</sup>, Vladimir S. Borodkin<sup>1</sup>, Joby Varghese<sup>2</sup>, Andrew T. Ferenbach<sup>1</sup>

and Daan M. F. van Aalten<sup>1\*</sup>

<sup>1</sup>Centre for Gene Regulation and Expression and <sup>2</sup>MRC Protein Phosphorylation and Ubiquitylation Unit,  
School of Life Sciences, University of Dundee, Dundee, UK

\*Correspondence to: [dmfvanaalten@dundee.ac.uk](mailto:dmfvanaalten@dundee.ac.uk)

**Supplementary Table 1: List of primers**

| <b>Primer</b>                                  | <b>Description</b>    |
|------------------------------------------------|-----------------------|
| GTGTCTGTGCCATACTGCAGCGCCAGAGCAC                | TAB1_S395C_F          |
| GTGCTCTGGGCGCTGCAGTATGGCACAGACAC               | TAB1_S395C_R          |
| AAAGGATCCATGGCGGCGCAGAGGAGGAGCTTG              | FLAG_TAB1_BamHI_F     |
| AAAGCGGCCGCTTACTACGGTGTGTACCACGCTC             | FLAG_TAB1_NotI_R      |
| CATCACACGCCCGTCTGCAGCGCCAATATG                 | CK2_peptide_S347C_F   |
| CATATTGGCGCTGCAGACGGGCGTGTGATG                 | CK2_peptide_S347C_R   |
| CACCGTGTAGTTACAACAGTTTACC                      | Mm405_gRNA_RIGHT_F    |
| AAACGGTAAACTGTTGTAACACTACAC                    | Mm405_gRNA_RIGHT_R    |
| CACCGACAGTTGTGGCATTAAAGA                       | Mm405_gRNA_LEFT_F     |
| AAACTCTTAAATGCCACAACACTGTC                     | Mm405_gRNA_LEFT_R     |
| AAAGGATCCTGGTCTCTGAGGGTACCAGGCATAC             | Mm405_2kb region_F    |
| AAAGCGGCCCGCAGGACTTAATCACAAACTGTAAAGCTGG       | Mm405_2kb region_R    |
| GCTCGCACTTATGTCGTTGAGCTTGG                     | Mm405_PCR_Check_F     |
| CACAGGCTCTGCGGTGTACAGAGG                       | Mm405_PCR_Check_R     |
| GTAGGTAGGCAAGTTGCACACTGCGGAGCTAAGACAAGTGTAGTTG | RF_Wobble_S405C_F     |
| CTGGTTGTCATTCTTGTGCTCTG                        | RF_Wobble_405_R       |
| CTTTTCATTTGGACCTGGCAC                          | MmOGA_405_sequencing  |
| AAAGGATCCTCAGTTTGAGGAGATATGATACCCTCC           | Mm405_outside_check_F |
| AGGTCATCTGGAACACTACCTGCCATTCC                  | Mm405_outside_check_R |
| GACTGACAGTGAAGACAGTACTGTATC                    | Mm405 RTPCR_check_F   |
| CCTAACCACTGCACAAAAGATTTACC                     | Mm405 RTPCR_check_R   |
| ATGAAGGCAGTGACGAAGAC                           | Mm405 RTPCR_seq_F     |
| ATAGACATTATACTCTTGATGTC                        | Mm405 RTPCR_seq_R     |

**Mouse OGA geneblock:**

AGGCAAGTTGCACACAGTGGAGCTAAGACAAGTGTAGTTGATGGGACTCCCTTAGTTGCTGCACCCA  
**GCCTGAACGCCACA**ACTGTAGT**GACCACCGTGTATCA**AGAGCCCATTATGAGCCAGGGAGCAGCTTT  
GAGTGGTGAACCCTCAGTTCTGACCAAGGAAGAGGAAAAGAAACAGCCAGATGAGGAACCCATGGAT  
ATGGTGGTCGAAAAGCAAGAAGAAGCAGAGCACAAAGAATGACAACCCAG

**Supplementary Table 2: List of antibodies used for Western blotting**

| <b>Antibody</b>      | <b>Species</b> | <b>Dilution</b> | <b>Company</b>           | <b>Catalogue number</b> |
|----------------------|----------------|-----------------|--------------------------|-------------------------|
| RL2 (O-GlcNAc)       | Mouse          | 1:1000          | Thermo Fisher Scientific | MA1-072                 |
| $\alpha$ -tubulin    | Rabbit         | 1:1000          | CST/Proteintech          | 2125/11224-1-AP         |
| TAB1                 | Sheep          | 1:1000          | DSTT (Dundee)            | -                       |
| O-GlcNAc TAB1        | Rabbit         | 1:1000          | DSTT (Dundee)            | -                       |
| OGT                  | Rabbit         | 1:1000          | Abcam                    | ab96718                 |
| CTD 110.6 (O-GlcNAc) | Mouse (IgM)    | 1:1000          | CST                      | 9875                    |
| FLAG (M2)            | Mouse          | 1:1000          | Sigma-Aldrich            | F1804                   |
| OGA                  | Rabbit         | 1:1000          | Sigma-Aldrich            | HPA036141               |

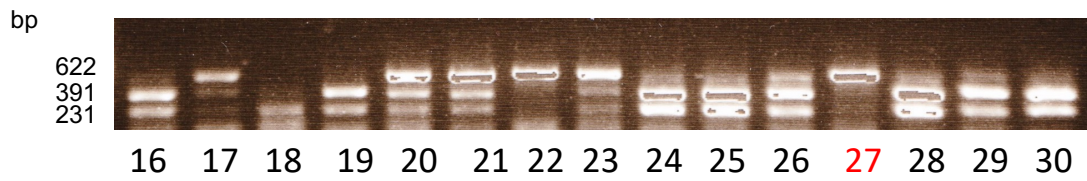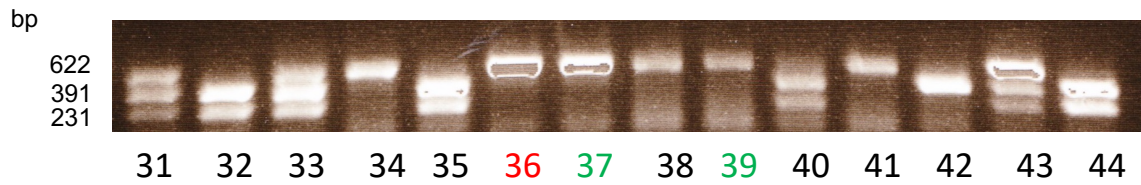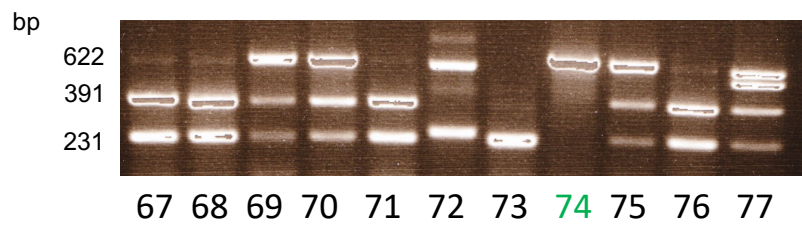

**Supplementary Figure 1: Restriction digestion of PCR products of a 622 bp OGA region covering the S405 site in mouse embryonic stem cells that underwent CRISPR-Cas9. Wild type clones further confirmed by sequencing are highlighted in red. OGA<sup>S405C</sup> knock-ins are highlighted in green.**

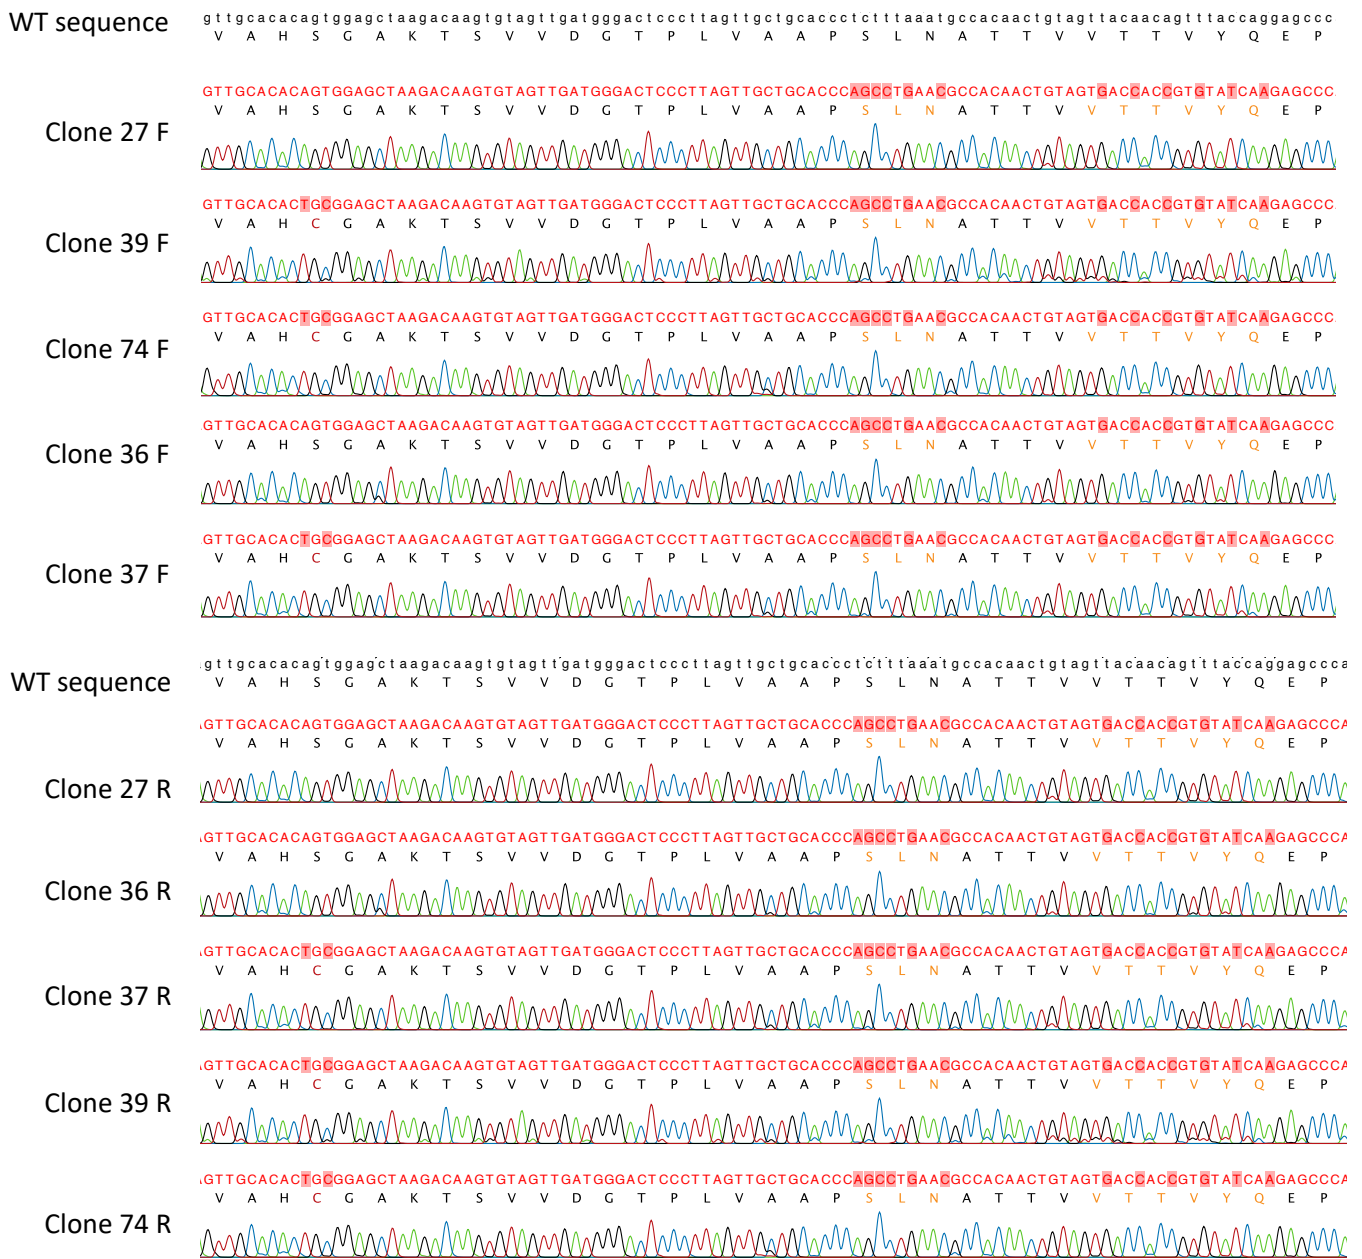

**Supplementary Figure 2: DNA sequencing results confirming the introduction of S405C mutation into OGA in mouse embryonic stem cells**

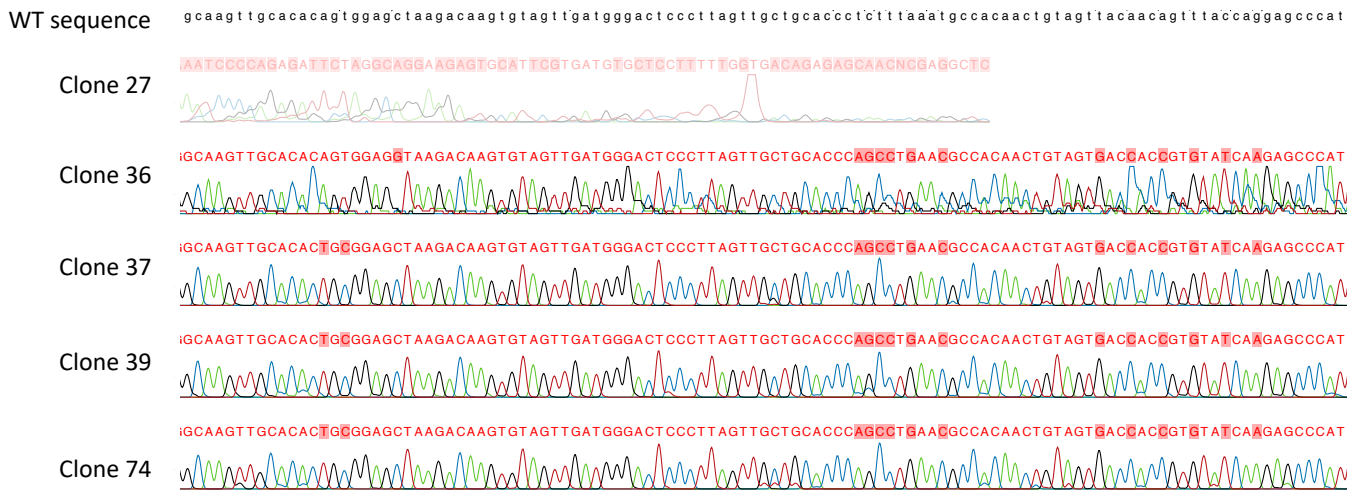

**Supplementary Figure 3: DNA sequencing results (larger PCR product) confirming the introduction of S405C mutation into OGA in mouse embryonic stem cells**

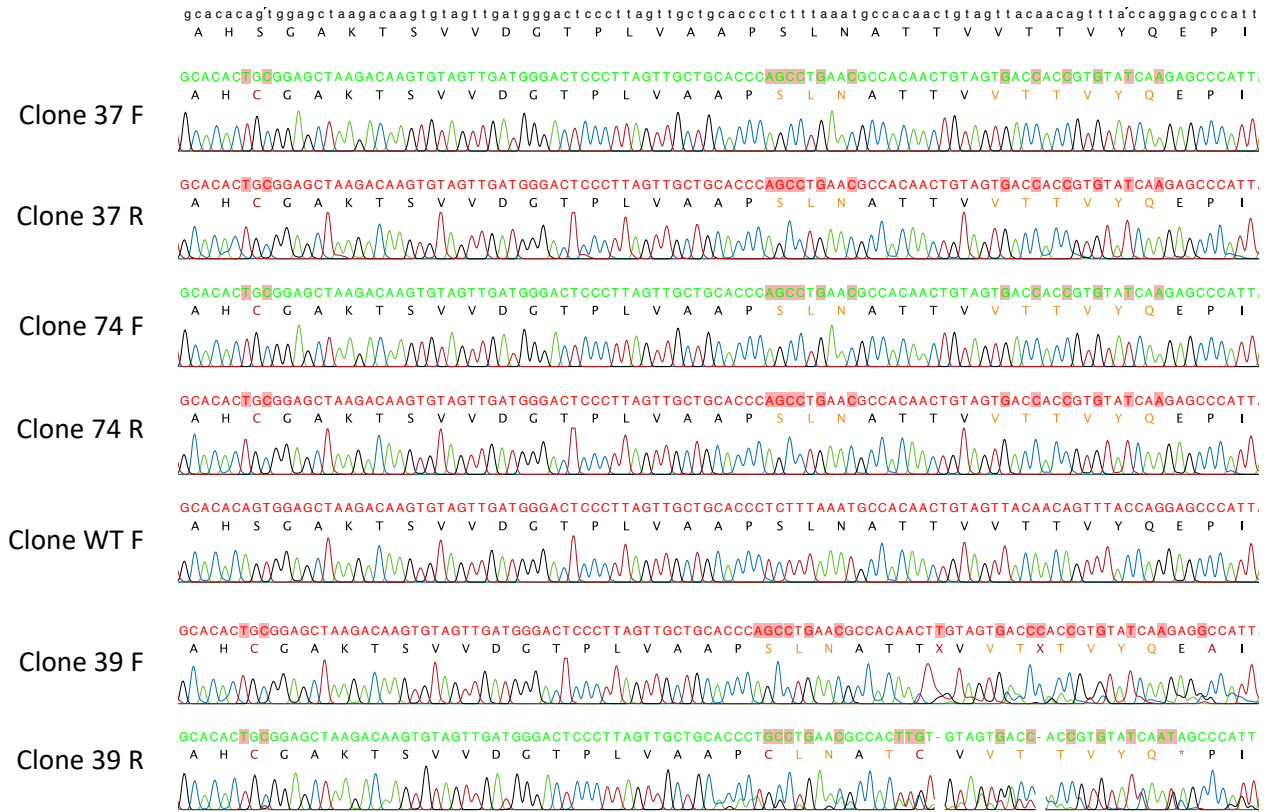

**Supplementary Figure 4: cDNA sequencing results confirming the introduction of S405C mutation into OGA in mouse embryonic stem cells**

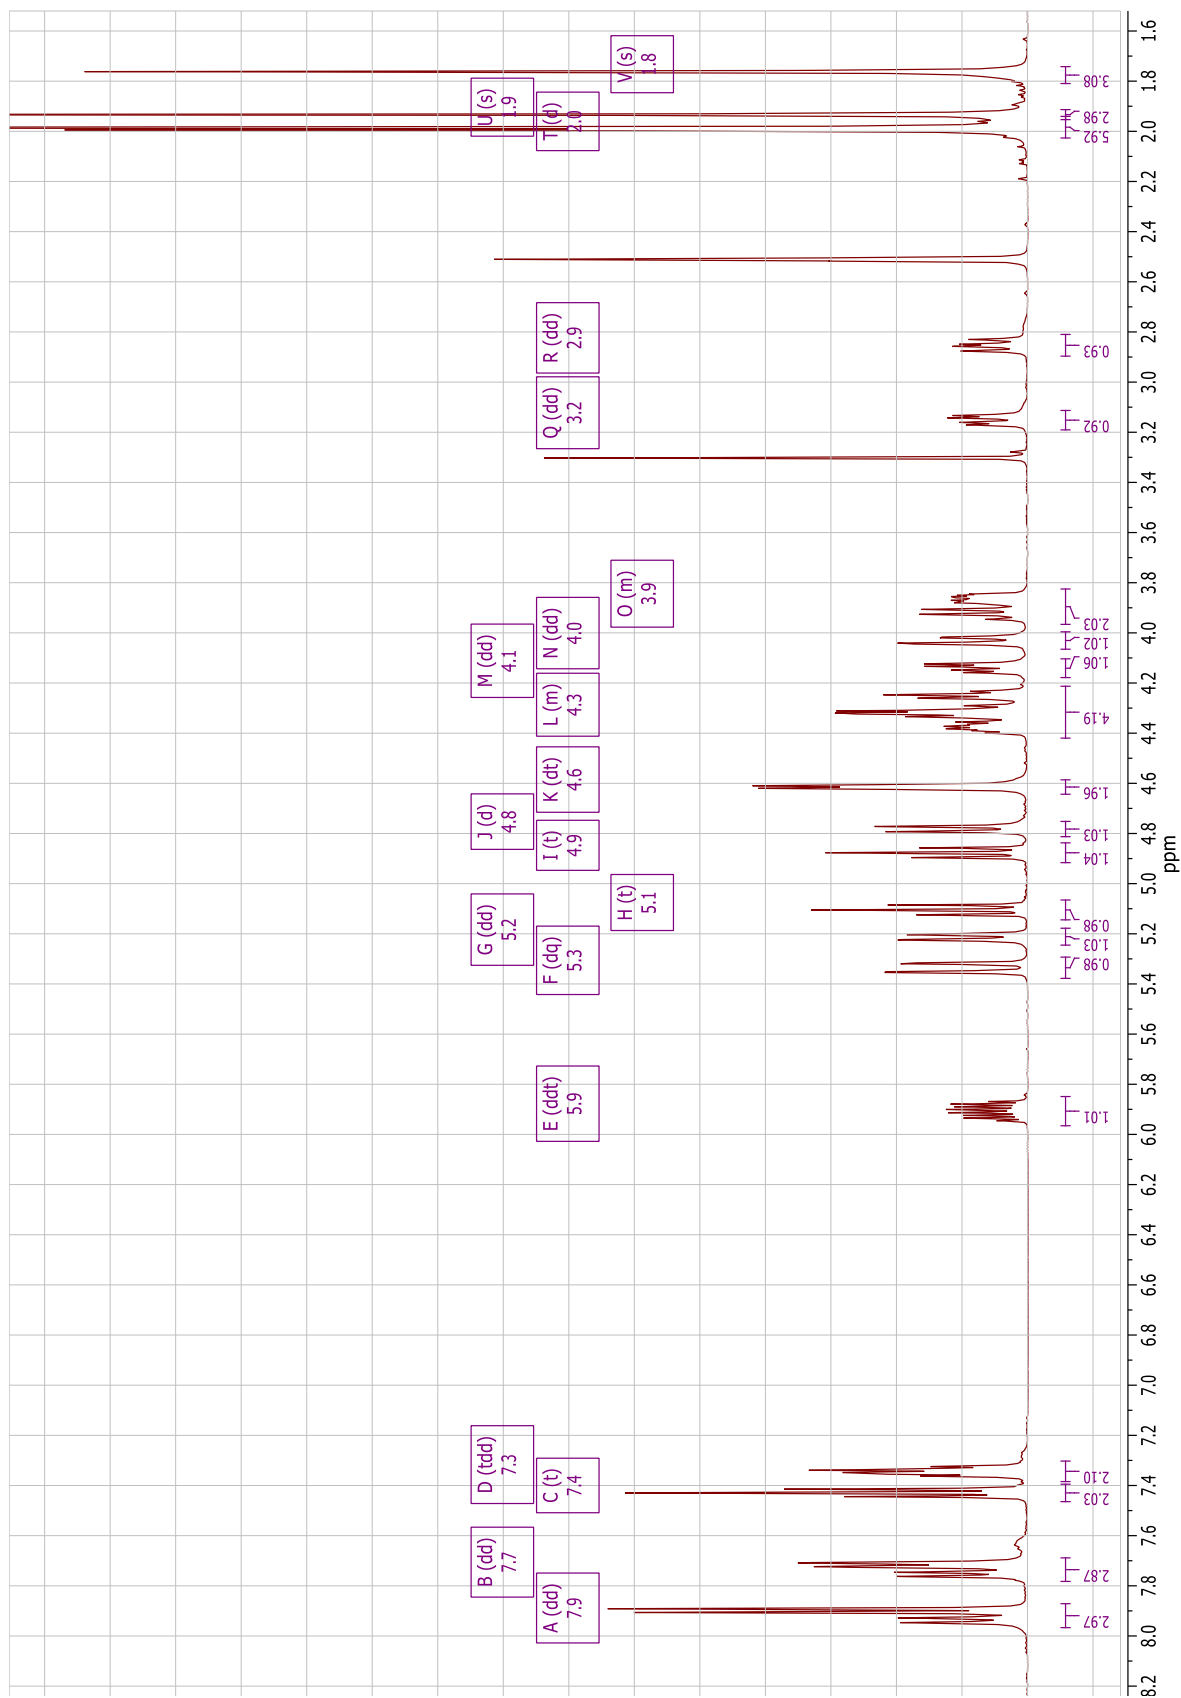

Supplementary Figure 5: <sup>1</sup>H NMR spectrum of compound 2
